# Supplementary material for: The relation of low glycaemic index fruit consumption to glycaemic control and risk factors for coronary heart disease in type 2 diabetes
Source: PubMed Central journal article supplement — Diabetologia. 2010 Oct 27;54(2):271–9. doi: 10.1007/s00125-010-1927-1 (PMC3017317; doi:10.1007/s00125-010-1927-1), 2010-10-27
Supplement: 125_2010_1927_MOESM2_ESM.pdf [file 125_2010_1927_MOESM2_ESM.pdf]

## Electronic supplementary material

**ESM Table 2** Baseline nutritional profile, biochemical measurements and CHD risk (mean, 95% CI) for quartiles of low GI fruit intake of the completer population ( $n=152$ )

| Variable                       | Q1   |           | Q2   |           | Q3   |           | Q4   |           | Q4 vs Q1 |             |                |
|--------------------------------|------|-----------|------|-----------|------|-----------|------|-----------|----------|-------------|----------------|
|                                | Mean | 95% CI    | $\Delta$ | 95% CI      | <i>p</i> value |
| Body weight                    | 82   | 77–86     | 88   | 82–95     | 92   | 86–99     | 84   | 77–90     | 2        | –6, 10      | 0.566          |
| Fruit intake (servings/day)    |      |           |      |           |      |           |      |           |          |             |                |
| Total fruit                    | 2.0  | 1.6–2.4   | 1.2  | 0.8–1.5   | 1.2  | 0.9–1.4   | 1.3  | 1.1–1.6   | –0.6     | –1.1, –0.2  | 0.008          |
| Low GI fruit                   | 1.2  | 0.9–1.4   | 0.6  | 0.4–0.8   | 0.5  | 0.4–0.7   | 0.6  | 0.4–0.8   | –0.6     | –0.9, –0.3  | <0.001         |
| Fibre (g/4,184 kJ)             | 16   | 14–17     | 14   | 12–15     | 13   | 12–15     | 13   | 11–15     | –3       | –5, 0       | 0.034          |
| GI                             | 80   | 78–82     | 82   | 80–84     | 82   | 80–84     | 81   | 79–83     | 1        | –2, 4       | 0.429          |
| HbA <sub>1c</sub> (%)          | 7.00 | 6.80–7.20 | 7.10 | 6.90–7.30 | 7.10 | 7.00–7.30 | 7.20 | 7.00–7.40 | 0.23     | –0.02, 0.48 | 0.740          |
| Fasting blood glucose (mmol/l) | 7.56 | 7.05–8.08 | 7.15 | 6.68–7.62 | 7.89 | 7.36–8.42 | 7.78 | 7.16–8.41 | 0.22     | –0.57, 1.02 | 0.581          |
| Total cholesterol (mmol/l)     | 4.28 | 4.01–4.55 | 4.17 | 3.95–4.39 | 4.21 | 3.91–4.50 | 4.18 | 3.84–4.53 | –0.09    | –0.52, 0.34 | 0.667          |
| HDL-C (mmol/l)                 | 1.21 | 1.11–1.31 | 1.07 | 0.99–1.16 | 1.01 | 0.92–1.10 | 1.11 | 0.99–1.22 | –0.11    | –0.26, 0.04 | 0.154          |
| LDL-C/HDL-C (mmol/l)           | 2.16 | 1.96–2.36 | 2.40 | 2.13–2.67 | 2.55 | 2.25–2.85 | 2.29 | 1.99–2.59 | 0.13     | –0.22, 0.48 | 0.467          |
| CHD risk                       | 0.12 | 0.10–0.14 | 0.15 | 0.13–0.17 | 0.16 | 0.13–0.18 | 0.14 | 0.12–0.17 | 0.03     | 0.00–0.06   | 0.084          |

Differences between baseline values between quartiles 1 and 4 were assessed by two-sample *t* test

HDL-C, HDL-cholesterol; LDL-C, LDL-cholesterol; Q, quartile
