# Supplementary material for: The relation of low glycaemic index fruit consumption to glycaemic control and risk factors for coronary heart disease in type 2 diabetes
Source: Springer Nature journal article supplement (doi:10.1007/s00125-010-1927-1), 2010-10-26
Supplement: MOESM1 [file 8089556]

## Electronic supplementary material

**ESM Table 1** Baseline characteristics of participants in quartiles of low GI fruit

| Characteristic                   | Q1      | Q2      | Q3      | Q4      | Q4 vs Q1       |
|----------------------------------|---------|---------|---------|---------|----------------|
|                                  | Mean±SD | Mean±SD | Mean±SD | Mean±SD | <i>p</i> value |
| Age (years)                      | 62±9    | 62±10   | 61±10   | 60±9    | 0.452          |
| Sex (male/female)                | 19/19   | 26/12   | 26/12   | 25/13   | 0.226/0.189    |
| BMI (kg/m <sup>2</sup> )         | 30±4    | 31±6    | 32±6    | 30±6    | 0.584          |
| Ethnicity ( <i>n</i> )           |         |         |         |         |                |
| European                         | 23      | 29      | 25      | 26      | 0.388          |
| Indian                           | 7       | 6       | 7       | 5       | 0.387          |
| Far Eastern                      | 4       | 0       | 0       | 5       | 0.500          |
| African                          | 3       | 3       | 3       | 2       | 0.500          |
| Hispanic                         | 0       | 0       | 1       | 0       | NA             |
| Native American                  | 1       | 0       | 2       | 0       | 0.500          |
| Smokers ( <i>n</i> )             | 0       | 1       | 2       | 7       | 0.008          |
| Duration of diabetes (years)     | 6±4     | 8±8     | 8±5     | 9±7     | 0.025          |
| Medication use ( <i>n</i> )      |         |         |         |         |                |
| Hypoglycaemic agent              | 37      | 38      | 37      | 38      | 0.500          |
| Thiazolidinedione                | 10      | 16      | 11      | 13      | 0.339          |
| Biguanide                        | 30      | 30      | 31      | 30      | 0.551          |
| Sulfonylurea                     | 15      | 20      | 21      | 22      | 0.162          |
| Meglitinide (non-sulfonylurea)   | 1       | 1       | 0       | 1       | 0.750          |
| Alpha glucosidase inhibitor      | 1       | 1       | 0       | 3       | 0.313          |
| Cholesterol-lowering medications | 24      | 22      | 25      | 30      | 0.248          |
| Blood pressure medication        | 27      | 26      | 26      | 25      | 0.445          |

Differences between quartiles 1 and 4 in categorical variables were assessed by binomial tests of equality

Differences in continuous variables were assessed by two-sample *t* test

Q, quartile
