# Supplementary material for: The relation of low glycaemic index fruit consumption to glycaemic control and risk factors for coronary heart disease in type 2 diabetes
Source: Springer Nature journal article supplement (doi:10.1007/s00125-010-1927-1), 2010-10-26
Supplement: MOESM3 [file 8089556]

## Electronic supplementary material

**ESM Table 3** Changes in nutritional profile (i.e. week 24-0) and percentage changes in biochemical markers and CHD risk (i.e. %  $\Delta$  week 24-0) (mean, 95% CI) for quartiles of low GI fruit intake of the completer population ( $n=152$ )

| Characteristic                   | Q1       |            | Q2       |            | Q3       |          | Q4       |          | Difference between Q4 vs Q1 |          |                |  |
|----------------------------------|----------|------------|----------|------------|----------|----------|----------|----------|-----------------------------|----------|----------------|--|
|                                  | $\Delta$ | 95% CI     | $\Delta$ | 95% CI     | $\Delta$ | 95% CI   | $\Delta$ | 95% CI   | Mean                        | 95% CI   | <i>p</i> value |  |
| Dietary changes                  |          |            |          |            |          |          |          |          |                             |          |                |  |
| Body weight                      | -3       | -4, -2     | -2       | -3, -1     | -3       | -4, -2   | -3       | -4, -2   | 0                           | -2, 2    | 0.973          |  |
| Fruit intake (servings/day)      |          |            |          |            |          |          |          |          |                             |          |                |  |
| Total fruit                      | 0.1      | -0.4, 0.6  | 0.6      | 0.3, 0.9   | 0.5      | 0.2, 0.7 | 1.1      | 0.7, 1.5 | 1.0                         | 0.4, 1.6 | 0.002          |  |
| Low GI fruit                     | -0.9     | -1.1, -0.7 | -0.2     | -0.2, -0.1 | 0.2      | 0.1, 0.3 | 1.3      | 1.1, 1.5 | 2.2                         | 1.9, 2.4 | <0.001         |  |
| Fibre (g/4,184 kJ)               | 2        | 0, 4       | 3        | 2, 5       | 3        | 1, 5     | 8        | 6, 10    | 6                           | 3, 9     | <0.001         |  |
| GI                               | 1        | -2, 4      | -3       | -6, 0      | -8       | -11, -5  | -15      | -18, -12 | -16                         | -20, -12 | <0.001         |  |
| Biochemical changes <sup>a</sup> |          |            |          |            |          |          |          |          |                             |          |                |  |
| HbA <sub>1c</sub>                | -4       | -7, -1     | -4       | -7, -1     | -8       | -10, -5  | -10      | -13, -8  | -6                          | -10, 3   | 0.001          |  |
| Fasting blood glucose            | -3       | -8, -2     | 0        | -6, 5      | -10      | -19, 0   | -11      | -17, -6  | -8                          | -16, -1  | 0.027          |  |
| Total cholesterol                | 0        | -5, -6     | 3        | -1, 7      | -2       | -7, 3    | -1       | -5, 4    | -1                          | -8, 6    | 0.789          |  |
| LDL-C                            | 1        | -7, -10    | 5        | 0-11       | -1       | -9, 7    | 1        | -8, 11   | 0                           | -12, 12  | 0.984          |  |
| HDL-C                            | -1       | -5, 3      | 2        | -1, 5      | 7        | 2, 12    | 6        | 1, 11    | 7                           | 1, 13    | 0.019          |  |
| Triacylglycerol                  | 7        | -3, 16     | 1        | -11, 12    | -9       | -17, 0   | 2        | -17, 21  | -4                          | -25, 17  | 0.695          |  |
| Total C/HDL-C                    | 2        | -4, 8      | 1        | -3, 6      | -6       | -13, 0   | -5       | -12, 3   | -6                          | -16, 3   | 0.162          |  |
| LDL-C/HDL-C                      | 3        | -6, 12     | 4        | -2, 10     | -5       | -14, 5   | -4       | -13, 6   | -7                          | -20, 6   | 0.287          |  |
| Systolic BP                      | 0        | -2, 3      | -2       | -6, 1      | -2       | -5, 1    | -4       | -6, -1   | -4                          | -8, 0    | 0.044          |  |
| Diastolic BP                     | 0        | -3, 3      | -2       | -5, 2      | -3       | -6, 1    | -2       | -6, 1    | -2                          | -7, 2    | 0.368          |  |
| CHD risk                         | 3        | -4, 9      | -2       | -9, 5      | -9       | -18, -1  | -11      | -18, -3  | -13                         | -23, -3  | 0.010          |  |

Differences between baseline values between quartiles 1 and 4 were assessed by two-sample *t* test

C, cholesterol; HDL-C, HDL-cholesterol; LDL-C, LDL-cholesterol; Q, quartile

<sup>a</sup>% Changes are shown for biochemical measurements
